# Supplementary material
Source: PubMed Central journal article supplement (PMC2934734)
Supplement: supp_137.19.3215_DEV050575-TableS1.pdf [file supp_137.19.3215_DEV050575-TableS1.pdf]

**Table S1. Fertility/sterility of different mutants**

|                | <i>CC00511</i> | <i>f02600</i> | <i>f01889</i> | <i>e03440</i> | <i>KG06463</i> | <i>Df(ED4457)</i> |
|----------------|----------------|---------------|---------------|---------------|----------------|-------------------|
| <i>CC00511</i> | Fertile        | Fertile       | Fertile       | Fertile       | Fertile        | Fertile           |
| <i>f02600</i>  | Fertile        | Fertile       | Fertile       | Fertile       | Fertile        | Fertile           |
| <i>f01889</i>  | Fertile        | Fertile       | Sterile       | Sterile       | Fertile        | Sterile           |
| <i>e03440</i>  | Fertile        | Fertile       | Sterile       | Sterile       | Fertile        | Sterile           |
| <i>KG06463</i> | Fertile        | Fertile       | Fertile       | Fertile       | Sterile        | Sterile           |
